# Supplementary material for: Identification and Validation of a GPX4-Related Immune Prognostic Signature for Lung Adenocarcinoma
Source: Hindawi journal article supplement (doi:10.1155/2022/9054983), 2022-05-17
Supplement: f1 [file 9054983.f1.zip]

Table S7: The four GPX4-related prognostic genes in the TCGA-LUAD dataset

| Gene   | Normal (Mean) | LUAD (Mean) | logFC  | p-Value | FDR    |
|--------|---------------|-------------|--------|---------|--------|
| KIF14  | 0.101         | 1.547       | 3.939  | <0.001  | <0.001 |
| LATS2  | 10.73         | 5.198       | -1.046 | <0.001  | <0.001 |
| PRKCE  | 6.251         | 1.945       | -1.685 | <0.001  | <0.001 |
| TM6SF1 | 3.785         | 1.594       | -1.247 | <0.001  | <0.001 |
