# Supplementary material for: Identification and Validation of a GPX4-Related Immune Prognostic Signature for Lung Adenocarcinoma
Source: Hindawi journal article supplement (doi:10.1155/2022/9054983), 2022-05-17
Supplement: f1 [file 9054983.f1.zip]

Table S5: GSEA in the low-risk score cohort

| NAME                                         | SIZE | ES     | NES    | NOM p-val | FDR q-val |
|----------------------------------------------|------|--------|--------|-----------|-----------|
| Cell adhesion molecules cams                 | 131  | -0.66  | -2.259 | < 0.001   | < 0.001   |
| Intestinal immune network for IgA production | 46   | -0.801 | -2.135 | < 0.001   | 0.002     |
| JAK STAT signaling pathway                   | 155  | -0.529 | -2.109 | < 0.001   | 0.003     |
| Cytokine cytokine receptor interaction       | 264  | -0.558 | -2.084 | < 0.001   | 0.003     |
| Chemokine signaling pathway                  | 188  | -0.549 | -2.04  | < 0.001   | 0.005     |
| Toll like receptor signaling pathway         | 102  | -0.548 | -2.007 | < 0.001   | 0.007     |
| B cell receptor signaling pathway            | 75   | -0.581 | -1.947 | 0.004     | 0.011     |
| Natural killer cell mediated cytotoxicity    | 132  | -0.506 | -1.821 | 0.008     | 0.028     |
| VEGF signaling pathway                       | 76   | -0.455 | -1.813 | < 0.001   | 0.028     |
| T cell receptor signaling pathway            | 108  | -0.519 | -1.821 | 0.010     | 0.029     |

| <u>RANK AT MAX</u> |
|--------------------|
| 4745               |
| 4745               |
| 8398               |
| 6227               |
| 6712               |
| 6494               |
| 4855               |
| 6592               |
| 5541               |
| <u>6193</u>        |
