# Supplementary material for: Identification and Validation of a GPX4-Related Immune Prognostic Signature for Lung Adenocarcinoma
Source: Hindawi journal article supplement (doi:10.1155/2022/9054983), 2022-05-17
Supplement: f1 [file 9054983.f1.zip]

Table S3: The prognostic gene list related to OS of the GDEGs in the TCGA-LUAD dataset

| Gene     | K-M<br>P value | HR    | HR.95L | HR.95H | Cox<br>P value |
|----------|----------------|-------|--------|--------|----------------|
| AC005856 | 0.049          | 0.553 | 0.317  | 0.966  | 0.037          |
| DOCK4    | 0.012          | 0.841 | 0.743  | 0.951  | 0.006          |
| KIF14    | <0.001         | 1.16  | 1.075  | 1.252  | <0.001         |
| LATS2    | 0.03           | 1.061 | 1.009  | 1.116  | 0.019          |
| MZT2A    | 0.039          | 1.047 | 1.006  | 1.089  | 0.022          |
| PRKCE    | 0.018          | 0.71  | 0.571  | 0.882  | 0.002          |
| TM6SF1   | 0.047          | 0.774 | 0.645  | 0.93   | 0.006          |
