# Supplementary material for: Identification and Validation of a GPX4-Related Immune Prognostic Signature for Lung Adenocarcinoma
Source: Hindawi journal article supplement (doi:10.1155/2022/9054983), 2022-05-17
Supplement: f1 [file 9054983.f1.zip]

Table S2: The results of spearman's correlation analysis

| Gene     | cor    | P-value  | Gene      | cor    | P-value  |
|----------|--------|----------|-----------|--------|----------|
| A2M      | -0.214 | 5.81E-07 | H2AFZP3   | -0.243 | 1.33E-08 |
| ABCA8    | -0.219 | 3.19E-07 | H2AFZP4   | -0.240 | 1.85E-08 |
| ABCA9    | -0.301 | 1.05E-12 | HAGHL     | 0.330  | 4.88E-15 |
| ABHD11   | 0.294  | 4.02E-12 | HASPIN    | -0.244 | 1.14E-08 |
| ABI3BP   | -0.231 | 6.77E-08 | HCN2      | 0.258  | 1.42E-09 |
| AC002128 | -0.213 | 6.37E-07 | HDHD3     | 0.257  | 1.58E-09 |
| AC002128 | -0.260 | 1.05E-09 | HEATR1    | -0.254 | 2.45E-09 |
| AC003991 | -0.245 | 8.83E-09 | HECW2     | -0.219 | 3.32E-07 |
| AC004223 | -0.236 | 3.24E-08 | HEG1      | -0.362 | 4.93E-18 |
| AC004461 | -0.249 | 5.08E-09 | HELLS     | -0.265 | 4.56E-10 |
| AC004466 | -0.219 | 3.05E-07 | HIST2H2B  | -0.222 | 2.04E-07 |
| AC004832 | -0.253 | 2.8E-09  | HM13-IT1  | -0.203 | 2.14E-06 |
| AC004832 | -0.256 | 1.93E-09 | HMBS      | 0.303  | 7.58E-13 |
| AC004837 | -0.254 | 2.56E-09 | HMGA1P2   | -0.216 | 4.78E-07 |
| AC004884 | -0.223 | 1.96E-07 | HMGB3P4   | -0.254 | 2.42E-09 |
| AC004890 | -0.244 | 1.01E-08 | HNRNPA3   | -0.286 | 1.46E-11 |
| AC004908 | -0.236 | 3.41E-08 | HOMER3    | 0.268  | 2.88E-10 |
| AC005034 | -0.236 | 3.51E-08 | HOOK1     | -0.253 | 3.08E-09 |
| AC005062 | -0.203 | 2.28E-06 | HRASLS    | 0.212  | 7.32E-07 |
| AC005154 | -0.204 | 1.88E-06 | HSP90B1   | -0.268 | 2.76E-10 |
| AC005256 | 0.240  | 1.9E-08  | HSPA8P15  | -0.254 | 2.47E-09 |
| AC005326 | -0.204 | 1.85E-06 | HSPD1P11  | -0.209 | 1.11E-06 |
| AC005519 | -0.262 | 7.83E-10 | HSPE1P3   | -0.205 | 1.82E-06 |
| AC005522 | -0.214 | 5.87E-07 | HYAL2     | 0.316  | 7.02E-14 |
| AC005730 | -0.220 | 2.9E-07  | IFNG-AS1  | -0.233 | 4.77E-08 |
| AC005828 | -0.222 | 2.21E-07 | IGF2BP3   | -0.202 | 2.39E-06 |
| AC005831 | -0.257 | 1.67E-09 | IGHJ3P    | -0.204 | 1.89E-06 |
| AC005839 | -0.259 | 1.2E-09  | IGHV3-79  | -0.241 | 1.77E-08 |
| AC005856 | -0.240 | 1.85E-08 | IGKJ5     | -0.228 | 1E-07    |
| AC006023 | -0.225 | 1.43E-07 | IKZF2     | -0.288 | 1.08E-11 |
| AC006111 | -0.212 | 7.76E-07 | IL18R1    | -0.246 | 8.12E-09 |
| AC006330 | -0.241 | 1.63E-08 | IL37      | 0.201  | 2.75E-06 |
| AC006441 | -0.272 | 1.71E-10 | IL7R      | -0.247 | 7E-09    |
| AC006480 | -0.239 | 2.16E-08 | ILF2      | 0.208  | 1.2E-06  |
| AC006504 | -0.212 | 7.08E-07 | IMMP1LP1  | -0.243 | 1.24E-08 |
| AC007000 | -0.239 | 2.08E-08 | INPP4B    | -0.288 | 1.18E-11 |
| AC007014 | -0.203 | 2.08E-06 | INSYN2    | -0.217 | 4.11E-07 |
| AC007038 | -0.235 | 3.56E-08 | IRF4      | -0.215 | 5.06E-07 |
| AC007191 | -0.231 | 6.36E-08 | IRF7      | 0.278  | 6.16E-11 |
| AC007283 | -0.208 | 1.22E-06 | ISCA1P4   | 0.238  | 2.49E-08 |
| AC007285 | -0.245 | 9.1E-09  | ISG15     | 0.253  | 3.01E-09 |
| AC007365 | -0.255 | 2.15E-09 | ITFG1-AS1 | -0.235 | 3.59E-08 |
| AC007494 | -0.246 | 8.29E-09 | ITGA6-AS  | -0.202 | 2.41E-06 |
| AC007494 | -0.234 | 4.19E-08 | ITGA8     | -0.205 | 1.67E-06 |
| AC007546 | -0.220 | 2.86E-07 | ITPKA     | 0.218  | 3.69E-07 |
| AC007569 | -0.254 | 2.58E-09 | ITPRID2   | -0.298 | 1.98E-12 |
| AC007639 | -0.237 | 2.95E-08 | ITPRIP    | -0.206 | 1.59E-06 |
| AC007731 | -0.233 | 4.82E-08 | JCAD      | -0.201 | 2.92E-06 |
| AC007906 | -0.251 | 4.21E-09 | JPT1      | 0.290  | 7.84E-12 |
| AC007919 | -0.224 | 1.65E-07 | KCNAB1    | -0.260 | 9.58E-10 |
| AC007991 | -0.226 | 1.33E-07 | KCND2     | -0.208 | 1.16E-06 |
| AC007991 | -0.208 | 1.15E-06 | KCNQ1OT   | -0.242 | 1.42E-08 |
| AC008115 | -0.243 | 1.26E-08 | KCNT2     | -0.204 | 1.99E-06 |
| AC008243 | -0.238 | 2.37E-08 | KCTD12    | -0.268 | 2.95E-10 |
| AC008267 | -0.265 | 4.44E-10 | KDELRL3   | 0.213  | 6.85E-07 |
| AC008731 | -0.283 | 2.81E-11 | KIAA1211  | -0.248 | 5.91E-09 |

|          |        |          |           |        |          |
|----------|--------|----------|-----------|--------|----------|
| AC008895 | -0.242 | 1.52E-08 | KIAA1324I | -0.248 | 6.52E-09 |
| AC009005 | 0.288  | 1.15E-11 | KIF14     | -0.221 | 2.56E-07 |
| AC009268 | -0.220 | 2.93E-07 | KIF20B    | -0.248 | 5.71E-09 |
| AC009704 | -0.253 | 3.03E-09 | KIF26B    | -0.257 | 1.6E-09  |
| AC009754 | -0.241 | 1.64E-08 | KISS1R    | 0.381  | 5.78E-20 |
| AC009994 | -0.232 | 5.57E-08 | KLF13     | -0.320 | 3.07E-14 |
| AC010149 | -0.252 | 3.57E-09 | KLF4      | -0.224 | 1.69E-07 |
| AC010168 | -0.264 | 5.58E-10 | KLF9      | -0.243 | 1.21E-08 |
| AC010186 | -0.223 | 1.87E-07 | KNL1      | -0.284 | 2.03E-11 |
| AC010201 | -0.238 | 2.57E-08 | KNTC1     | -0.278 | 5.85E-11 |
| AC010210 | -0.235 | 4.03E-08 | KRTCAP2   | 0.341  | 5.38E-16 |
| AC010320 | -0.242 | 1.52E-08 | KRTCAP3   | 0.276  | 8.62E-11 |
| AC010378 | -0.246 | 7.64E-09 | LAGE3     | 0.276  | 8.26E-11 |
| AC010422 | -0.236 | 3.36E-08 | LATS2     | -0.290 | 7.83E-12 |
| AC010524 | -0.203 | 2.17E-06 | LAX1      | -0.255 | 2.28E-09 |
| AC010834 | -0.267 | 3.53E-10 | LCOR      | -0.328 | 6.9E-15  |
| AC010976 | -0.265 | 4.96E-10 | LDB2      | -0.250 | 4.9E-09  |
| AC011373 | -0.209 | 1.09E-06 | LIFR      | -0.239 | 2.08E-08 |
| AC011465 | -0.267 | 3.3E-10  | LINC0021I | -0.257 | 1.53E-09 |
| AC011742 | -0.247 | 7.17E-09 | LINC0041I | -0.218 | 3.54E-07 |
| AC011815 | -0.213 | 6.3E-07  | LINC0046I | 0.250  | 4.35E-09 |
| AC011825 | -0.246 | 8.28E-09 | LINC0047I | -0.231 | 6.94E-08 |
| AC011933 | -0.211 | 8.93E-07 | LINC0051I | -0.216 | 4.58E-07 |
| AC011933 | -0.214 | 6.21E-07 | LINC0062I | -0.206 | 1.53E-06 |
| AC012170 | -0.243 | 1.34E-08 | LINC0063I | -0.256 | 1.83E-09 |
| AC012213 | -0.229 | 8.19E-08 | LINC0129I | -0.204 | 1.91E-06 |
| AC012254 | -0.226 | 1.21E-07 | LINC0135I | -0.252 | 3.44E-09 |
| AC012447 | -0.249 | 5.18E-09 | LINC0142I | 0.217  | 4.25E-07 |
| AC012513 | -0.346 | 1.9E-16  | LINC0147I | -0.246 | 7.62E-09 |
| AC012640 | 0.327  | 8.03E-15 | LINC0151I | -0.205 | 1.74E-06 |
| AC013394 | -0.243 | 1.22E-08 | LINC0183I | 0.229  | 8.74E-08 |
| AC015799 | -0.249 | 5.37E-09 | LINC0196I | -0.298 | 2.14E-12 |
| AC015849 | -0.256 | 1.81E-09 | LINC0246I | -0.208 | 1.24E-06 |
| AC015914 | -0.237 | 3.02E-08 | LINC0256I | 0.231  | 6.12E-08 |
| AC015923 | -0.228 | 9.95E-08 | LPAR2     | 0.282  | 3.1E-11  |
| AC015987 | -0.262 | 7.31E-10 | LRP2BP    | -0.225 | 1.49E-07 |
| AC016027 | -0.238 | 2.53E-08 | LRRC20    | 0.294  | 4E-12    |
| AC016590 | -0.247 | 7.19E-09 | LRRC37A1  | -0.257 | 1.61E-09 |
| AC016737 | -0.224 | 1.57E-07 | LRRFIP1P1 | -0.323 | 1.85E-14 |
| AC017002 | -0.220 | 2.61E-07 | LRRN3     | -0.257 | 1.55E-09 |
| AC018410 | -0.243 | 1.18E-08 | LSAMP     | -0.287 | 1.42E-11 |
| AC018682 | -0.217 | 4.28E-07 | LST1      | 0.313  | 1.36E-13 |
| AC018766 | -0.287 | 1.22E-11 | MACC1-A   | -0.220 | 2.87E-07 |
| AC019226 | -0.231 | 6.78E-08 | MAD2L2    | 0.339  | 7.54E-16 |
| AC019226 | -0.222 | 2.09E-07 | MAFG-DT   | 0.307  | 3.95E-13 |
| AC020612 | -0.262 | 8.03E-10 | MAGI2-AS1 | -0.250 | 4.67E-09 |
| AC020612 | -0.274 | 1.19E-10 | MAL2-AS1  | -0.247 | 6.81E-09 |
| AC020661 | -0.232 | 6.01E-08 | MARCKSL   | -0.207 | 1.41E-06 |
| AC020765 | 0.207  | 1.44E-06 | MATR3     | -0.262 | 7.6E-10  |
| AC020910 | -0.221 | 2.46E-07 | MBNL1-A   | -0.243 | 1.24E-08 |
| AC020913 | -0.236 | 3.15E-08 | MCC       | -0.362 | 5.53E-18 |
| AC020916 | -0.203 | 2.14E-06 | MCM3AP    | -0.246 | 8.6E-09  |
| AC021087 | -0.235 | 3.7E-08  | MCM8      | -0.242 | 1.36E-08 |
| AC022150 | -0.284 | 2.15E-11 | MCRIP2    | 0.395  | 2.11E-21 |
| AC022211 | -0.202 | 2.48E-06 | MCTS2P    | -0.248 | 5.71E-09 |
| AC022336 | -0.251 | 4.19E-09 | MDK       | 0.206  | 1.58E-06 |
| AC022784 | -0.295 | 3.28E-12 | MESP1     | 0.314  | 1.14E-13 |
| AC022960 | -0.251 | 3.9E-09  | MESP2     | 0.204  | 2.02E-06 |

|                 |          |          |        |          |
|-----------------|----------|----------|--------|----------|
| AC022973 -0.262 | 8.02E-10 | METTL26  | 0.503  | 1.08E-35 |
| AC023051 -0.235 | 3.83E-08 | MFSD13B  | -0.251 | 3.75E-09 |
| AC023271 -0.244 | 1.07E-08 | MFSD9    | -0.225 | 1.45E-07 |
| AC023590 -0.244 | 1.16E-08 | MGST1    | 0.265  | 4.57E-10 |
| AC023818 -0.276 | 8.24E-11 | MIF      | 0.389  | 7.98E-21 |
| AC023825 -0.224 | 1.65E-07 | MINCR    | 0.209  | 1.02E-06 |
| AC023906 -0.232 | 5.93E-08 | MIR181A1 | -0.235 | 3.87E-08 |
| AC024267 -0.260 | 9.57E-10 | MIR30C2  | -0.231 | 6.41E-08 |
| AC024267 -0.264 | 5.42E-10 | MIR3174  | -0.221 | 2.51E-07 |
| AC025031 -0.256 | 1.98E-09 | MIR3192  | -0.291 | 6.25E-12 |
| AC025043 -0.262 | 7.2E-10  | MIR320B2 | -0.261 | 8.64E-10 |
| AC025287 -0.257 | 1.69E-09 | MIR3657  | -0.266 | 4.14E-10 |
| AC025917 -0.265 | 4.63E-10 | MIR378J  | -0.238 | 2.42E-08 |
| AC026202 -0.236 | 3.3E-08  | MIR3942  | -0.233 | 4.78E-08 |
| AC026356 -0.258 | 1.32E-09 | MIR4653  | 0.230  | 7.55E-08 |
| AC026368 -0.262 | 7.77E-10 | MIR4668  | -0.225 | 1.44E-07 |
| AC027176 -0.261 | 8.56E-10 | MIR4677  | -0.223 | 1.78E-07 |
| AC027277 -0.215 | 5.15E-07 | MIR548AA | -0.215 | 5.03E-07 |
| AC027514 -0.262 | 7.26E-10 | MIR579   | -0.213 | 6.69E-07 |
| AC027544 -0.259 | 1.22E-09 | MIR593   | -0.222 | 2.17E-07 |
| AC027544 -0.267 | 3.72E-10 | MIR643   | -0.232 | 5.7E-08  |
| AC027763 -0.221 | 2.38E-07 | MIR645   | -0.227 | 1.17E-07 |
| AC027796 -0.244 | 1.13E-08 | MIR6740  | -0.226 | 1.25E-07 |
| AC027796 -0.232 | 5.96E-08 | MITF     | -0.285 | 1.97E-11 |
| AC027801 -0.219 | 2.97E-07 | MKI67    | -0.202 | 2.42E-06 |
| AC032044 -0.254 | 2.6E-09  | MMS22L   | -0.336 | 1.52E-15 |
| AC035139 -0.209 | 1.14E-06 | MNX1-AS  | 0.285  | 1.81E-11 |
| AC037459 -0.291 | 7.01E-12 | MPHOSPH  | -0.329 | 6.15E-15 |
| AC040169 -0.240 | 1.96E-08 | MPP6     | -0.266 | 3.87E-10 |
| AC040904 -0.205 | 1.74E-06 | MRGBP    | 0.215  | 5.35E-07 |
| AC040934 -0.220 | 2.63E-07 | MROH6    | 0.223  | 1.76E-07 |
| AC063965 -0.241 | 1.6E-08  | MRPL12   | 0.429  | 2.45E-25 |
| AC067817 -0.261 | 8.59E-10 | MRPL13   | 0.235  | 3.62E-08 |
| AC067931 -0.210 | 9.65E-07 | MRPL15   | 0.220  | 2.66E-07 |
| AC067945 -0.222 | 2.14E-07 | MRPL24   | 0.387  | 1.62E-20 |
| AC068025 -0.254 | 2.36E-09 | MRPL36   | 0.337  | 1.14E-15 |
| AC069257 -0.220 | 2.74E-07 | MRPS12   | 0.281  | 3.84E-11 |
| AC073052 -0.255 | 2.19E-09 | MRT04    | 0.275  | 9.31E-11 |
| AC073107 -0.226 | 1.35E-07 | MSI2     | -0.337 | 1.16E-15 |
| AC073210 -0.210 | 9.03E-07 | MSRB1    | 0.287  | 1.38E-11 |
| AC073333 -0.258 | 1.48E-09 | MSRB3    | -0.238 | 2.67E-08 |
| AC073367 -0.254 | 2.49E-09 | MTFP1    | 0.309  | 2.59E-13 |
| AC074138 -0.254 | 2.49E-09 | MTX1     | 0.325  | 1.23E-14 |
| AC078778 -0.258 | 1.39E-09 | MUC21    | 0.258  | 1.31E-09 |
| AC078852 -0.253 | 2.94E-09 | MXRA5    | -0.214 | 5.87E-07 |
| AC078883 -0.261 | 8.85E-10 | MYBPH    | 0.358  | 1.17E-17 |
| AC079601 -0.249 | 5.55E-09 | MYH10    | -0.258 | 1.39E-09 |
| AC079684 -0.245 | 9.17E-09 | MYLK     | -0.293 | 4.38E-12 |
| AC079921 -0.231 | 6.8E-08  | MYOCD    | -0.206 | 1.6E-06  |
| AC083798 -0.242 | 1.48E-08 | MZT2A    | 0.360  | 8.76E-18 |
| AC083837 -0.205 | 1.77E-06 | NAA25    | -0.330 | 5.09E-15 |
| AC087276 -0.263 | 6.4E-10  | NAALADL  | -0.231 | 6.63E-08 |
| AC087294 -0.231 | 6.32E-08 | NABP2    | 0.220  | 2.83E-07 |
| AC087392 -0.218 | 3.56E-07 | NADK2-A  | -0.257 | 1.54E-09 |
| AC087683 -0.241 | 1.74E-08 | NARF     | 0.221  | 2.5E-07  |
| AC090114 -0.283 | 2.8E-11  | NARF-IT1 | -0.211 | 8.62E-07 |
| AC090517 -0.212 | 7.66E-07 | NAT9     | 0.302  | 1E-12    |
| AC090579 -0.206 | 1.61E-06 | NAV1     | -0.315 | 9.07E-14 |

|                 |          |          |        |          |
|-----------------|----------|----------|--------|----------|
| AC090695 -0.276 | 8.75E-11 | NAV2-AS  | -0.233 | 5.03E-08 |
| AC090739 -0.243 | 1.19E-08 | NAXE     | 0.341  | 5.37E-16 |
| AC091057 -0.240 | 1.84E-08 | NCAPD3   | -0.211 | 8.33E-07 |
| AC091057 -0.219 | 3.07E-07 | NCBP2-AS | -0.222 | 2.17E-07 |
| AC091390 -0.244 | 1.09E-08 | NCKAP5   | -0.290 | 8.56E-12 |
| AC092168 -0.215 | 5.24E-07 | NDST1    | -0.289 | 9.05E-12 |
| AC092171 -0.252 | 3.29E-09 | NDUFB4P1 | -0.246 | 7.64E-09 |
| AC092279 -0.219 | 3.01E-07 | NDUFS6   | 0.352  | 5.07E-17 |
| AC092338 -0.251 | 3.77E-09 | NEAT1    | -0.226 | 1.32E-07 |
| AC092436 -0.233 | 5E-08    | NEB      | -0.223 | 1.8E-07  |
| AC092574 -0.239 | 2.08E-08 | NEBL     | -0.200 | 3.05E-06 |
| AC092755 -0.260 | 9.73E-10 | NECAB1   | -0.229 | 8.37E-08 |
| AC092802 -0.273 | 1.39E-10 | NEGR1    | -0.232 | 5.54E-08 |
| AC092828 -0.229 | 9.03E-08 | NEXN     | -0.260 | 9.98E-10 |
| AC092839 -0.241 | 1.71E-08 | NFASC    | -0.224 | 1.67E-07 |
| AC092964 -0.216 | 4.42E-07 | NFYC-AS1 | -0.227 | 1.14E-07 |
| AC093110 -0.260 | 1.01E-09 | NHS      | -0.240 | 1.91E-08 |
| AC093278 -0.224 | 1.63E-07 | NHSL1    | -0.241 | 1.68E-08 |
| AC093484 -0.202 | 2.39E-06 | NME1     | 0.397  | 1.09E-21 |
| AC093690 -0.243 | 1.23E-08 | NME1-NM  | 0.275  | 9.49E-11 |
| AC093724 -0.255 | 2.18E-09 | NME2     | 0.437  | 2.69E-26 |
| AC093788 -0.231 | 6.53E-08 | NME4     | 0.370  | 8.69E-19 |
| AC096720 -0.253 | 3.05E-09 | NOL3     | 0.210  | 1.01E-06 |
| AC096921 -0.272 | 1.67E-10 | NOP16    | 0.236  | 3.38E-08 |
| AC097372 -0.221 | 2.39E-07 | NPM1P26  | -0.240 | 1.8E-08  |
| AC097460 -0.241 | 1.73E-08 | NPM1P29  | -0.241 | 1.54E-08 |
| AC097634 -0.226 | 1.34E-07 | NPM3     | 0.324  | 1.46E-14 |
| AC097641 -0.219 | 2.97E-07 | NPR3     | -0.222 | 2.17E-07 |
| AC098591 -0.236 | 3.1E-08  | NR2F6    | 0.263  | 6.57E-10 |
| AC098869 -0.261 | 8.56E-10 | NRBF2P5  | -0.258 | 1.45E-09 |
| AC098934 -0.205 | 1.69E-06 | NSD2     | -0.287 | 1.26E-11 |
| AC099343 -0.244 | 1.04E-08 | NSUN5    | 0.285  | 1.98E-11 |
| AC099778 -0.258 | 1.3E-09  | NUDT1    | 0.241  | 1.64E-08 |
| AC099811 -0.247 | 7.04E-09 | NUDT17   | 0.245  | 9.15E-09 |
| AC099811 -0.241 | 1.56E-08 | NUDT8    | 0.337  | 1.07E-15 |
| AC100821 -0.250 | 4.79E-09 | OCIAD2   | 0.203  | 2.17E-06 |
| AC100821 -0.225 | 1.4E-07  | OCLM     | -0.244 | 1.1E-08  |
| AC103739 -0.266 | 4.21E-10 | ODCP     | -0.248 | 6.3E-09  |
| AC104115 -0.230 | 7.69E-08 | OLFML1   | -0.210 | 9.99E-07 |
| AC104667 0.254  | 2.36E-09 | OSTCP8   | -0.244 | 1.12E-08 |
| AC104695 -0.222 | 2.21E-07 | OXLD1    | 0.447  | 1.36E-27 |
| AC105235 -0.224 | 1.69E-07 | P2RY1    | -0.261 | 9.38E-10 |
| AC105339 -0.248 | 6.28E-09 | P4HB     | 0.202  | 2.41E-06 |
| AC106037 -0.255 | 2.17E-09 | PA2G4P6  | -0.239 | 2.2E-08  |
| AC108058 -0.222 | 2.1E-07  | PABPC1P1 | -0.236 | 3.12E-08 |
| AC108471 -0.243 | 1.18E-08 | PAFAH1B  | 0.220  | 2.77E-07 |
| AC108704 -0.276 | 8.82E-11 | PAIP1P1  | -0.256 | 1.86E-09 |
| AC108727 -0.249 | 5.58E-09 | PCDH17   | -0.290 | 7.89E-12 |
| AC108860 -0.237 | 2.98E-08 | PCDH9    | -0.228 | 9.71E-08 |
| AC109322 0.205  | 1.84E-06 | PCDHGB7  | -0.277 | 7.29E-11 |
| AC109460 -0.228 | 1E-07    | PCDHGC3  | -0.285 | 1.96E-11 |
| AC109583 -0.246 | 8.68E-09 | PCNX2    | -0.315 | 9.04E-14 |
| AC110285 0.240  | 1.9E-08  | PCSK4    | 0.288  | 1.19E-11 |
| AC111170 -0.257 | 1.56E-09 | PDCD2L   | 0.230  | 6.99E-08 |
| AC112694 -0.246 | 7.77E-09 | PDCD6    | 0.217  | 3.82E-07 |
| AC112722 -0.203 | 2.24E-06 | PDE5A    | -0.329 | 5.42E-15 |
| AC113139 -0.224 | 1.71E-07 | PDE8B    | -0.301 | 1.08E-12 |
| AC113191 -0.311 | 1.76E-13 | PDK1     | -0.262 | 7.04E-10 |

|                 |          |          |        |          |
|-----------------|----------|----------|--------|----------|
| AC114402 -0.250 | 4.46E-09 | PDZD11   | 0.314  | 1.06E-13 |
| AC114402 -0.239 | 2.06E-08 | PDZD2    | -0.246 | 8.21E-09 |
| AC116552 -0.213 | 6.45E-07 | PEAK1    | -0.427 | 4.4E-25  |
| AC117500 -0.256 | 2E-09    | PEAR1    | -0.226 | 1.32E-07 |
| AC117503 -0.269 | 2.63E-10 | PERM1    | 0.260  | 1.02E-09 |
| AC125807 -0.241 | 1.76E-08 | PFDN2    | 0.274  | 1.19E-10 |
| AC127024 -0.236 | 3.28E-08 | PFDN6    | 0.311  | 1.92E-13 |
| AC127024 -0.229 | 8.21E-08 | PHACTR2  | -0.360 | 7.37E-18 |
| AC127024 -0.247 | 7.34E-09 | PHBP12   | -0.258 | 1.32E-09 |
| AC127070 -0.268 | 3.02E-10 | PHBP19   | -0.249 | 5.25E-09 |
| AC130650 -0.202 | 2.35E-06 | PHLDA2   | 0.338  | 9.54E-16 |
| AC131009 -0.272 | 1.52E-10 | PHLDB2   | -0.247 | 7.13E-09 |
| AC131159 -0.251 | 3.8E-09  | PIK3CD-A | 0.269  | 2.57E-10 |
| AC131212 -0.283 | 2.6E-11  | PIP5K1B  | -0.201 | 2.63E-06 |
| AC131649 -0.245 | 9.31E-09 | PIP5KL1  | 0.295  | 3.54E-12 |
| AC131971 -0.242 | 1.54E-08 | PITPNA-A | 0.216  | 4.7E-07  |
| AC132192 -0.259 | 1.13E-09 | PLAGL1   | -0.254 | 2.57E-09 |
| AC132938 -0.202 | 2.48E-06 | PLCE1    | -0.283 | 2.43E-11 |
| AC133473 -0.240 | 2.02E-08 | PLEKHA6  | -0.204 | 1.9E-06  |
| AC134349 -0.242 | 1.34E-08 | PLEKHA8  | -0.269 | 2.58E-10 |
| AC134407 -0.254 | 2.46E-09 | PLEKHH2  | -0.277 | 6.61E-11 |
| AC134407 -0.233 | 5.08E-08 | PLPP2    | 0.302  | 8.87E-13 |
| AC134775 -0.280 | 4.41E-11 | PLPP3    | -0.256 | 1.98E-09 |
| AC135279 -0.250 | 4.55E-09 | PLSCR4   | -0.333 | 2.82E-15 |
| AC136475 -0.237 | 2.78E-08 | PMM2     | -0.212 | 7.39E-07 |
| AC138393 -0.220 | 2.62E-07 | POF1B    | -0.220 | 2.77E-07 |
| AC138393 -0.234 | 4.5E-08  | POLQ     | -0.238 | 2.48E-08 |
| AC138409 -0.223 | 1.94E-07 | POLR2H   | 0.318  | 4.65E-14 |
| AC138409 -0.218 | 3.52E-07 | POLR2KP1 | -0.255 | 2.27E-09 |
| AC138466 -0.205 | 1.7E-06  | POMK     | -0.277 | 7.34E-11 |
| AC138696 0.219  | 3.22E-07 | POP7     | 0.311  | 1.86E-13 |
| AC138932 -0.268 | 2.84E-10 | POU2AF1  | -0.214 | 5.57E-07 |
| AC139720 -0.238 | 2.41E-08 | PPIAP40  | -0.230 | 7.16E-08 |
| AC139887 -0.242 | 1.4E-08  | PPIAP42  | -0.225 | 1.52E-07 |
| AC139887 -0.306 | 4.51E-13 | PPIAP51  | -0.239 | 2.1E-08  |
| AC139887 -0.239 | 2.05E-08 | PPIAP91  | -0.243 | 1.33E-08 |
| AC141002 -0.218 | 3.6E-07  | PPP1R14B | 0.363  | 4.51E-18 |
| AC145146 -0.202 | 2.54E-06 | PPP1R14B | 0.362  | 5.79E-18 |
| AC145343 0.305  | 6.06E-13 | PPP1R16A | 0.231  | 6.82E-08 |
| AC145676 -0.219 | 3.18E-07 | PPP1R35  | 0.339  | 6.75E-16 |
| AC211433 -0.253 | 3.16E-09 | PREX2    | -0.278 | 5.88E-11 |
| AC211476 -0.232 | 5.56E-08 | PRICKLE2 | -0.294 | 4.02E-12 |
| AC233300 -0.276 | 8.47E-11 | PRKAA2   | -0.257 | 1.68E-09 |
| AC243654 -0.242 | 1.42E-08 | PRKCA-A  | -0.225 | 1.51E-07 |
| AC243732 -0.231 | 6.64E-08 | PRKCE    | -0.208 | 1.27E-06 |
| AC244033 -0.224 | 1.54E-07 | PRKCQ    | -0.211 | 8.7E-07  |
| AC244093 -0.239 | 2.23E-08 | PRKDC    | -0.298 | 2.01E-12 |
| AC244093 -0.254 | 2.72E-09 | PRKG1    | -0.309 | 2.49E-13 |
| AC245014 -0.234 | 4.29E-08 | PRR36    | 0.212  | 7.09E-07 |
| AC245100 -0.253 | 3.02E-09 | PRR7     | 0.207  | 1.37E-06 |
| AC245100 -0.224 | 1.65E-07 | PRR7-AS1 | -0.219 | 3E-07    |
| AC245100 -0.206 | 1.6E-06  | PSD3     | -0.337 | 1.12E-15 |
| AC245884 -0.225 | 1.4E-07  | PSMB4    | 0.323  | 1.84E-14 |
| AC245884 -0.259 | 1.21E-09 | PSMD10P  | -0.249 | 5.43E-09 |
| AC253576 -0.223 | 1.92E-07 | PSMG3    | 0.367  | 1.87E-18 |
| ACACB -0.271    | 1.72E-10 | PTGFRN   | -0.304 | 6.69E-13 |
| ADAM12 -0.204   | 1.92E-06 | PTPN21   | -0.288 | 1.13E-11 |
| ADAM15 0.313    | 1.37E-13 | PTPRB    | -0.308 | 3.39E-13 |

|          |        |          |          |        |          |
|----------|--------|----------|----------|--------|----------|
| ADAM28   | -0.268 | 3.09E-10 | PTRH2    | 0.241  | 1.56E-08 |
| ADAMTS1  | -0.221 | 2.29E-07 | PUS7L    | -0.296 | 2.91E-12 |
| ADAMTS1  | -0.244 | 1.14E-08 | PUSL1    | 0.386  | 1.93E-20 |
| ADAMTS9  | -0.224 | 1.74E-07 | PYCR1    | 0.280  | 4.62E-11 |
| ADAMTSL  | -0.219 | 3.07E-07 | PYCR3    | 0.294  | 3.69E-12 |
| ADAMTSL  | 0.280  | 4.63E-11 | QKI      | -0.285 | 1.72E-11 |
| ADARB1   | -0.336 | 1.38E-15 | RAB25    | 0.310  | 2.42E-13 |
| ADGRL2   | -0.242 | 1.35E-08 | RAB5IF   | 0.223  | 1.91E-07 |
| AF117829 | -0.233 | 5.3E-08  | RAC3     | 0.291  | 6.9E-12  |
| AF131215 | -0.267 | 3.35E-10 | RALGPS2  | -0.212 | 7.12E-07 |
| AF230666 | -0.255 | 2.21E-09 | RASGEF1E | -0.241 | 1.67E-08 |
| AFAP1L1  | -0.308 | 3.51E-13 | RASSF2   | -0.275 | 1.01E-10 |
| AGTPBP1  | -0.267 | 3.59E-10 | RBM12B-1 | -0.298 | 2.11E-12 |
| AHNAK    | -0.310 | 2.21E-13 | RBMS3    | -0.207 | 1.45E-06 |
| AK1      | 0.231  | 6.84E-08 | RCC1     | 0.205  | 1.72E-06 |
| AL008718 | -0.247 | 6.89E-09 | RDH10-A  | -0.229 | 8.16E-08 |
| AL022067 | -0.233 | 4.91E-08 | RECK     | -0.294 | 3.74E-12 |
| AL022097 | -0.240 | 1.94E-08 | REEP6    | 0.413  | 2.07E-23 |
| AL022157 | -0.212 | 7.72E-07 | RF00019  | -0.260 | 1.07E-09 |
| AL023807 | -0.208 | 1.2E-06  | RF00139  | -0.225 | 1.4E-07  |
| AL031009 | -0.225 | 1.35E-07 | RF00212  | -0.251 | 4.07E-09 |
| AL031768 | -0.226 | 1.28E-07 | RF00275  | -0.226 | 1.29E-07 |
| AL034550 | -0.236 | 3.11E-08 | RF00404  | -0.236 | 3.38E-08 |
| AL049539 | -0.238 | 2.68E-08 | RF00406  | -0.202 | 2.54E-06 |
| AL049869 | -0.269 | 2.44E-10 | RF00409  | -0.245 | 9.81E-09 |
| AL050341 | -0.230 | 7.13E-08 | RF00411  | -0.269 | 2.36E-10 |
| AL080317 | -0.212 | 7.6E-07  | RF00422  | -0.263 | 6.98E-10 |
| AL080317 | -0.245 | 9.41E-09 | RF00569  | -0.237 | 2.74E-08 |
| AL096828 | 0.217  | 3.91E-07 | RF01293  | -0.239 | 2.05E-08 |
| AL109614 | -0.269 | 2.37E-10 | RFWD3    | -0.245 | 9.41E-09 |
| AL109628 | -0.252 | 3.56E-09 | RGS14    | 0.274  | 1.19E-10 |
| AL109811 | 0.213  | 6.48E-07 | RHBDL1   | 0.255  | 2.19E-09 |
| AL110115 | -0.232 | 5.34E-08 | RHOD     | 0.305  | 5.37E-13 |
| AL121601 | -0.247 | 7.51E-09 | RHOJ     | -0.241 | 1.76E-08 |
| AL121652 | -0.230 | 7.51E-08 | RN7SKP27 | -0.249 | 5.12E-09 |
| AL121845 | -0.210 | 9.04E-07 | RN7SKP2E | -0.253 | 2.73E-09 |
| AL121992 | -0.241 | 1.55E-08 | RN7SKP3C | -0.225 | 1.54E-07 |
| AL132780 | -0.241 | 1.76E-08 | RN7SL192 | -0.232 | 5.38E-08 |
| AL132780 | -0.255 | 2.26E-09 | RN7SL239 | -0.246 | 8.47E-09 |
| AL133243 | -0.245 | 9.94E-09 | RN7SL333 | -0.264 | 5.78E-10 |
| AL133243 | -0.256 | 1.85E-09 | RN7SL566 | -0.203 | 2.28E-06 |
| AL136115 | -0.257 | 1.54E-09 | RN7SL67P | -0.205 | 1.69E-06 |
| AL136115 | -0.249 | 5.46E-09 | RN7SL809 | -0.228 | 9.37E-08 |
| AL136164 | -0.209 | 1.1E-06  | RN7SL812 | -0.239 | 2.32E-08 |
| AL136221 | -0.241 | 1.71E-08 | RN7SL81P | -0.251 | 3.72E-09 |
| AL138752 | -0.250 | 4.3E-09  | RNA5SP1C | -0.238 | 2.44E-08 |
| AL138831 | -0.209 | 1.04E-06 | RNA5SP1Z | -0.253 | 3.12E-09 |
| AL139128 | -0.235 | 3.96E-08 | RNA5SP2E | -0.226 | 1.32E-07 |
| AL139132 | -0.235 | 3.93E-08 | RNASEH2  | 0.249  | 5.55E-09 |
| AL139353 | -0.227 | 1.06E-07 | RNF144B  | -0.228 | 9.11E-08 |
| AL158801 | -0.229 | 8.65E-08 | RNU1-12Z | -0.253 | 2.82E-09 |
| AL158825 | -0.217 | 3.8E-07  | RNU1-13Z | -0.242 | 1.52E-08 |
| AL162274 | -0.207 | 1.34E-06 | RNU4-25F | -0.209 | 1.04E-06 |
| AL162431 | -0.222 | 2.18E-07 | RNU6-10C | -0.249 | 5.44E-09 |
| AL162578 | -0.247 | 7.49E-09 | RNU6-11E | -0.246 | 8.49E-09 |
| AL162724 | -0.241 | 1.62E-08 | RNU6-11E | -0.224 | 1.65E-07 |
| AL162724 | -0.224 | 1.67E-07 | RNU6-12C | -0.220 | 2.67E-07 |
| AL353593 | -0.225 | 1.52E-07 | RNU6-127 | -0.231 | 6.55E-08 |

|          |        |          |          |        |          |
|----------|--------|----------|----------|--------|----------|
| AL353662 | -0.223 | 1.76E-07 | RNU6-13C | -0.244 | 1.06E-08 |
| AL353662 | -0.220 | 2.86E-07 | RNU6-19C | -0.222 | 2E-07    |
| AL353748 | -0.258 | 1.34E-09 | RNU6-21C | -0.282 | 2.85E-11 |
| AL353801 | -0.242 | 1.49E-08 | RNU6-28C | -0.247 | 7.15E-09 |
| AL353804 | -0.213 | 6.36E-07 | RNU6-31C | -0.256 | 1.85E-09 |
| AL353807 | -0.209 | 1.13E-06 | RNU6-34I | -0.249 | 5.18E-09 |
| AL354726 | -0.264 | 5.82E-10 | RNU6-387 | -0.209 | 1.05E-06 |
| AL355075 | -0.238 | 2.51E-08 | RNU6-41C | -0.227 | 1.04E-07 |
| AL355353 | 0.245  | 9.58E-09 | RNU6-43I | -0.276 | 8.79E-11 |
| AL355488 | -0.243 | 1.23E-08 | RNU6-54C | -0.244 | 1.02E-08 |
| AL356055 | -0.220 | 2.7E-07  | RNU6-65C | -0.267 | 3.35E-10 |
| AL359075 | -0.203 | 2.12E-06 | RNU6-65C | -0.247 | 7.22E-09 |
| AL359740 | -0.202 | 2.44E-06 | RNU6-757 | -0.235 | 3.71E-08 |
| AL359880 | -0.246 | 8.05E-09 | RNU6-83C | -0.263 | 6.96E-10 |
| AL359922 | -0.256 | 1.82E-09 | RNU6-85C | -0.223 | 1.8E-07  |
| AL360091 | -0.232 | 5.56E-08 | RNU6-85C | -0.274 | 1.2E-10  |
| AL365277 | -0.252 | 3.59E-09 | RNU6-87C | -0.231 | 6.47E-08 |
| AL365356 | -0.252 | 3.19E-09 | RNU6-89C | -0.254 | 2.63E-09 |
| AL365436 | -0.221 | 2.44E-07 | RNU6-93C | -0.259 | 1.11E-09 |
| AL390719 | 0.280  | 4.26E-11 | RNU6ATA  | -0.229 | 8.15E-08 |
| AL391069 | 0.240  | 1.82E-08 | RNU6ATA  | -0.221 | 2.58E-07 |
| AL391994 | -0.247 | 6.82E-09 | RNU6V    | -0.219 | 3.25E-07 |
| AL445187 | -0.250 | 4.9E-09  | RNU7-75F | -0.241 | 1.64E-08 |
| AL445248 | -0.248 | 6.02E-09 | RNVU1-1  | -0.227 | 1.16E-07 |
| AL445435 | -0.252 | 3.43E-09 | RNY1P9   | -0.243 | 1.19E-08 |
| AL445471 | -0.207 | 1.32E-06 | RPL12P11 | -0.233 | 4.74E-08 |
| AL450384 | -0.244 | 1.06E-08 | RPL12P15 | -0.206 | 1.58E-06 |
| AL451060 | 0.214  | 5.83E-07 | RPL23AP1 | -0.211 | 8.95E-07 |
| AL512343 | -0.264 | 5.93E-10 | RPL23AP5 | -0.237 | 2.8E-08  |
| AL512506 | -0.263 | 6.42E-10 | RPL29P14 | -0.215 | 5.29E-07 |
| AL512656 | -0.284 | 2.16E-11 | RPL31P58 | -0.241 | 1.77E-08 |
| AL513327 | -0.223 | 1.99E-07 | RPL36AP1 | -0.237 | 2.73E-08 |
| AL513327 | -0.230 | 7.05E-08 | RPL7AP2  | -0.279 | 5.11E-11 |
| AL513365 | -0.237 | 2.92E-08 | RPL7P21  | -0.243 | 1.3E-08  |
| AL513365 | -0.251 | 4.05E-09 | RPL7P57  | -0.273 | 1.35E-10 |
| AL513523 | -0.215 | 5.29E-07 | RPS12P20 | -0.241 | 1.76E-08 |
| AL583832 | -0.254 | 2.56E-09 | RPS15AP1 | -0.261 | 8.32E-10 |
| AL589765 | 0.200  | 3.05E-06 | RPS15AP3 | -0.212 | 7.12E-07 |
| AL590006 | -0.238 | 2.65E-08 | RPS16P5  | -0.220 | 2.67E-07 |
| AL590723 | -0.241 | 1.65E-08 | RPS29P16 | -0.220 | 2.62E-07 |
| AL590762 | -0.249 | 5.37E-09 | RPS3AP38 | -0.258 | 1.46E-09 |
| AL592148 | -0.222 | 2.2E-07  | RPUSD1   | 0.216  | 4.64E-07 |
| AL604028 | -0.279 | 5.42E-11 | RRAS     | 0.251  | 4E-09    |
| AL606489 | -0.243 | 1.3E-08  | RSF1-IT2 | -0.237 | 3.01E-08 |
| AL662844 | -0.215 | 5.04E-07 | RTN4RL2  | 0.292  | 5.24E-12 |
| AL669831 | -0.243 | 1.31E-08 | RUNX1T1  | -0.295 | 3.17E-12 |
| AL669831 | -0.238 | 2.63E-08 | RUNX2    | -0.241 | 1.59E-08 |
| AL671986 | -0.248 | 5.78E-09 | RUSC1    | 0.215  | 5.46E-07 |
| AL691432 | -0.238 | 2.68E-08 | RWDD4P1  | -0.229 | 8.94E-08 |
| AL731563 | -0.212 | 7.56E-07 | SAC3D1   | 0.361  | 7.24E-18 |
| ALDH1L2  | -0.286 | 1.49E-11 | SAMD5    | -0.234 | 4.52E-08 |
| ALDOA    | 0.210  | 9.54E-07 | SAP30L-A | -0.217 | 3.81E-07 |
| ALG10    | -0.256 | 1.82E-09 | SASH1    | -0.403 | 2.9E-22  |
| ALG13-AS | -0.248 | 6.1E-09  | SCARNA1  | -0.208 | 1.25E-06 |
| ALG3     | 0.265  | 4.83E-10 | SCARNA8  | -0.214 | 5.93E-07 |
| ALMS1-IT | -0.202 | 2.51E-06 | SCN7A    | -0.238 | 2.46E-08 |
| AMOTL1   | -0.347 | 1.27E-16 | SDHAF3   | 0.220  | 2.81E-07 |
| ANGPTL1  | -0.276 | 8.97E-11 | SDHAP3   | 0.206  | 1.63E-06 |

|          |        |          |          |        |          |
|----------|--------|----------|----------|--------|----------|
| ANGPTL7  | -0.256 | 1.9E-09  | SEC24D   | -0.228 | 9.91E-08 |
| ANKRD10  | -0.295 | 3.13E-12 | SEC62-AS | -0.272 | 1.47E-10 |
| ANKRD36  | -0.261 | 8.2E-10  | SELENOI  | -0.224 | 1.65E-07 |
| ANKRD36  | -0.252 | 3.34E-09 | SELP     | -0.204 | 2.01E-06 |
| ANKRD36  | -0.274 | 1.18E-10 | SEMA3D   | -0.206 | 1.64E-06 |
| ANKRD61  | -0.269 | 2.48E-10 | SEMA6A   | -0.218 | 3.51E-07 |
| AP000560 | -0.247 | 7.48E-09 | SERINC1  | -0.313 | 1.23E-13 |
| AP000577 | -0.238 | 2.41E-08 | SERTAD1  | 0.327  | 7.96E-15 |
| AP000692 | -0.277 | 7.47E-11 | SETP5    | -0.232 | 6.03E-08 |
| AP000753 | -0.252 | 3.49E-09 | SGK494   | -0.204 | 1.97E-06 |
| AP000786 | -0.253 | 3.04E-09 | SIRT7    | 0.207  | 1.34E-06 |
| AP000866 | -0.235 | 3.78E-08 | SLC12A9  | -0.241 | 1.64E-08 |
| AP000873 | -0.219 | 3.18E-07 | SLC22A18 | 0.273  | 1.45E-10 |
| AP001001 | -0.265 | 4.85E-10 | SLC25A10 | 0.299  | 1.54E-12 |
| AP001021 | -0.209 | 1.12E-06 | SLC25A39 | 0.379  | 9.14E-20 |
| AP001033 | -0.232 | 5.85E-08 | SLC35B2  | 0.255  | 2.33E-09 |
| AP001189 | -0.202 | 2.39E-06 | SLC39A14 | -0.274 | 1.16E-10 |
| AP001429 | -0.238 | 2.49E-08 | SLC39A4  | 0.303  | 7.57E-13 |
| AP001432 | -0.227 | 1.08E-07 | SLC4A7   | -0.306 | 4.28E-13 |
| AP001469 | -0.237 | 2.87E-08 | SLC50A1  | 0.433  | 7.71E-26 |
| AP001528 | -0.200 | 2.99E-06 | SLC52A2  | 0.265  | 4.98E-10 |
| AP001528 | -0.217 | 4.11E-07 | SLFNL1-A | -0.207 | 1.41E-06 |
| AP001767 | -0.265 | 4.74E-10 | SLIT2    | -0.302 | 1.04E-12 |
| AP001893 | -0.262 | 7.07E-10 | SLIT3    | -0.203 | 2.19E-06 |
| AP002336 | -0.242 | 1.53E-08 | SMG1P3   | -0.264 | 5.52E-10 |
| AP002812 | -0.237 | 2.74E-08 | SMIM22   | 0.364  | 3.44E-18 |
| AP002907 | -0.246 | 8.74E-09 | SMYD5    | 0.210  | 9.47E-07 |
| AP003072 | -0.262 | 7.54E-10 | SNHG15   | 0.262  | 8.15E-10 |
| AP003086 | -0.229 | 8.49E-08 | SNHG17   | 0.232  | 6.09E-08 |
| AP003170 | -0.255 | 2.15E-09 | SNORA11  | -0.211 | 8.58E-07 |
| AP005131 | -0.245 | 9.74E-09 | SNORA11  | -0.217 | 4.03E-07 |
| AP005131 | -0.250 | 4.39E-09 | SNORA14  | -0.209 | 1.07E-06 |
| AP005136 | -0.240 | 1.9E-08  | SNORA22  | -0.200 | 3.06E-06 |
| AP005899 | -0.250 | 4.58E-09 | SNORA22  | -0.230 | 7.77E-08 |
| AP1S1    | 0.278  | 5.52E-11 | SNORA22  | -0.206 | 1.48E-06 |
| AP4B1-AS | -0.202 | 2.53E-06 | SNORA23  | -0.211 | 8.04E-07 |
| ARAP1-AS | -0.251 | 3.68E-09 | SNORA26  | -0.237 | 2.84E-08 |
| ARGFXP2  | -0.249 | 4.92E-09 | SNORA28  | -0.247 | 7.16E-09 |
| ARHGAP1  | -0.221 | 2.29E-07 | SNORA2A  | -0.243 | 1.33E-08 |
| ARHGAP2  | -0.250 | 4.85E-09 | SNORA33  | -0.201 | 2.77E-06 |
| ARHGAP3  | -0.218 | 3.71E-07 | SNORA53  | -0.236 | 3.2E-08  |
| ARHGAP6  | -0.226 | 1.24E-07 | SNORA55  | -0.266 | 4.01E-10 |
| ARHGEF3  | -0.243 | 1.3E-08  | SNORA58  | -0.245 | 1E-08    |
| ARHGEF6  | -0.264 | 5.34E-10 | SNORA5A  | -0.217 | 4.24E-07 |
| ARL13A   | -0.248 | 6.45E-09 | SNORA60  | -0.205 | 1.64E-06 |
| ARL4AP4  | -0.245 | 8.88E-09 | SNORA65  | -0.217 | 3.99E-07 |
| ARPC3P1  | -0.249 | 4.91E-09 | SNORA66  | -0.246 | 8.22E-09 |
| ASH1L-IT | -0.248 | 6.28E-09 | SNORA74  | -0.201 | 2.91E-06 |
| ASIC3    | 0.217  | 3.86E-07 | SNORA75  | -0.233 | 5.33E-08 |
| ASPM     | -0.239 | 2.17E-08 | SNORA80  | -0.232 | 6.1E-08  |
| ATAD5    | -0.290 | 7.47E-12 | SNORD10  | -0.252 | 3.59E-09 |
| ATP5PBP5 | -0.212 | 7.26E-07 | SNORD11  | -0.234 | 4.57E-08 |
| AVL9     | -0.237 | 2.85E-08 | SNORD11  | -0.231 | 6.77E-08 |
| B3GALNT2 | -0.319 | 4.22E-14 | SNORD12  | -0.234 | 4.48E-08 |
| B4GALT2  | 0.244  | 1.09E-08 | SNORD12  | -0.239 | 2.24E-08 |
| B4GALT3  | 0.204  | 1.9E-06  | SNORD12  | -0.202 | 2.45E-06 |
| BACE2    | -0.235 | 4E-08    | SNORD15  | -0.216 | 4.49E-07 |
| BARD1    | -0.205 | 1.81E-06 | SNORD15  | -0.214 | 6.02E-07 |



|           |        |          |           |        |          |
|-----------|--------|----------|-----------|--------|----------|
| BBIP1P1   | -0.266 | 4.04E-10 | SNORD19   | -0.248 | 6.24E-09 |
| BCAS2P2   | -0.225 | 1.38E-07 | SNORD53   | -0.248 | 6.1E-09  |
| BCL2L12   | 0.280  | 4.42E-11 | SNORD59   | -0.231 | 6.68E-08 |
| BIRC6-AS1 | -0.247 | 6.72E-09 | SNORD6    | -0.222 | 2.2E-07  |
| BMPR2     | -0.396 | 1.42E-21 | SNORD63   | -0.269 | 2.75E-10 |
| BNIP3P10  | -0.226 | 1.27E-07 | SNORD67   | -0.224 | 1.68E-07 |
| BNIP3P24  | -0.223 | 1.94E-07 | SNORD69   | -0.224 | 1.65E-07 |
| BNIP3P27  | -0.239 | 2.2E-08  | SNORD72   | -0.207 | 1.34E-06 |
| BNIP3P40  | -0.222 | 2.07E-07 | SNORD73   | -0.246 | 8.03E-09 |
| BNIP3P42  | -0.215 | 5.46E-07 | SNORD9    | -0.225 | 1.49E-07 |
| BOLA1     | 0.370  | 7.9E-19  | SNORD94   | -0.212 | 7.82E-07 |
| BOLA3     | 0.291  | 6.16E-12 | SNRK      | -0.413 | 2E-23    |
| BRCA1     | -0.219 | 3.16E-07 | SNRNP25   | 0.426  | 5.24E-25 |
| BRCA2     | -0.312 | 1.6E-13  | SNRPE     | 0.201  | 2.73E-06 |
| BTF3P12   | -0.239 | 2.06E-08 | SNRPGP1   | 0.228  | 9.54E-08 |
| C11orf65  | -0.234 | 4.07E-08 | SNX18P3   | -0.233 | 5.09E-08 |
| C14orf132 | -0.212 | 7.17E-07 | SPATA20   | 0.212  | 7.38E-07 |
| C17orf58  | 0.215  | 5.24E-07 | SPATC1L   | 0.207  | 1.35E-06 |
| C1orf115  | -0.209 | 1.1E-06  | SPATS2    | -0.218 | 3.77E-07 |
| C1orf35   | 0.373  | 3.82E-19 | SPDYA     | -0.249 | 5.18E-09 |
| C1orf53   | 0.308  | 3.41E-13 | SPDYE1    | -0.257 | 1.58E-09 |
| C1QBPP2   | -0.217 | 3.93E-07 | SPDYE5    | -0.247 | 6.64E-09 |
| C20orf194 | -0.343 | 3.26E-16 | SPTBN1    | -0.352 | 4.93E-17 |
| C2orf27A  | -0.264 | 5.54E-10 | SRM       | 0.248  | 6.53E-09 |
| C4orf48   | 0.365  | 2.74E-18 | SSR4      | 0.236  | 3.28E-08 |
| C5orf38   | 0.213  | 6.82E-07 | ST7-OT4   | -0.238 | 2.43E-08 |
| C9orf41-A | -0.256 | 1.81E-09 | STAP2     | 0.378  | 1.22E-19 |
| CALCRL    | -0.237 | 2.76E-08 | STARD13   | -0.344 | 2.42E-16 |
| CAPN12    | 0.235  | 3.98E-08 | STARD9    | -0.229 | 8.23E-08 |
| CASS4     | -0.207 | 1.31E-06 | STEAP2    | -0.207 | 1.37E-06 |
| CBX4      | 0.205  | 1.71E-06 | SULF1     | -0.226 | 1.33E-07 |
| CBX8      | 0.305  | 5.44E-13 | SUMO2P1   | -0.236 | 3.11E-08 |
| CCDC167   | 0.267  | 3.58E-10 | SUMO4     | -0.245 | 9.79E-09 |
| CCDC18    | -0.262 | 7.22E-10 | SUPT16HF  | -0.223 | 1.8E-07  |
| CCDC24    | 0.209  | 1.05E-06 | SUSD4     | 0.224  | 1.64E-07 |
| CCDC7     | -0.245 | 8.96E-09 | SVEP1     | -0.261 | 8.44E-10 |
| CCND2     | -0.207 | 1.33E-06 | SYCE1L    | 0.211  | 8.54E-07 |
| CD52      | 0.207  | 1.33E-06 | SYNE4     | 0.270  | 2.29E-10 |
| CD93      | -0.286 | 1.62E-11 | SYNJ2     | -0.340 | 5.52E-16 |
| CD99P1    | -0.238 | 2.37E-08 | SYNM      | -0.244 | 1.09E-08 |
| CDCA2     | -0.206 | 1.51E-06 | SYNPO2    | -0.299 | 1.52E-12 |
| CELF2     | -0.235 | 3.93E-08 | SYNPR-AS1 | 0.240  | 1.79E-08 |
| CENPE     | -0.210 | 1.01E-06 | SYT12     | 0.228  | 1.02E-07 |
| CENPF     | -0.222 | 2.04E-07 | TACC1     | -0.382 | 5.4E-20  |
| CERS6     | -0.304 | 7.08E-13 | TAPT1-AS1 | -0.201 | 2.74E-06 |
| CHKB-DT   | 0.205  | 1.67E-06 | TAS2R15P  | -0.254 | 2.71E-09 |
| CLDN3     | 0.232  | 5.85E-08 | TAS2R20   | -0.232 | 5.63E-08 |
| CLDN4     | 0.294  | 4.14E-12 | TATDN2P1  | -0.325 | 1.33E-14 |
| CLPTM1L   | 0.238  | 2.48E-08 | TBL1XR1-  | -0.245 | 8.92E-09 |
| CLSPN     | -0.222 | 2.27E-07 | TBX3      | -0.236 | 3.44E-08 |
| COA4      | 0.341  | 4.73E-16 | TBX5      | -0.222 | 2.11E-07 |
| COA6      | 0.231  | 6.75E-08 | TBX5-AS1  | -0.210 | 9.43E-07 |
| COL5A2    | -0.214 | 6.1E-07  | TCEAL3-A  | -0.227 | 1.17E-07 |
| COL6A3    | -0.239 | 2.04E-08 | TDGF1P5   | -0.242 | 1.41E-08 |
| COL6A5    | -0.209 | 1.1E-06  | TDRKH-A1  | 0.323  | 2.02E-14 |
| COL6A6    | -0.275 | 9.31E-11 | TENM4     | -0.244 | 1.15E-08 |
| COMTD1    | 0.299  | 1.51E-12 | TET1      | -0.303 | 8.32E-13 |
| COX6B1P1  | -0.259 | 1.21E-09 | TFPI2     | 0.285  | 1.86E-11 |

|           |        |          |          |        |          |
|-----------|--------|----------|----------|--------|----------|
| COX7A2P   | -0.261 | 8.39E-10 | TGFBR2   | -0.260 | 1.07E-09 |
| CPED1     | -0.269 | 2.66E-10 | TGFBR3   | -0.257 | 1.62E-09 |
| CR936218  | -0.265 | 4.57E-10 | TGFBR3L  | 0.353  | 3.89E-17 |
| CRABP2    | 0.250  | 4.75E-09 | TH2LCRR  | -0.223 | 2E-07    |
| CRACR2A   | -0.307 | 3.85E-13 | THRA1/BT | -0.219 | 3.14E-07 |
| CRIM1     | -0.321 | 2.76E-14 | TIMM8AP  | 0.243  | 1.21E-08 |
| CRYZP1    | -0.262 | 8.03E-10 | TK1      | 0.211  | 8.67E-07 |
| CXorf36   | -0.214 | 5.64E-07 | TLCD1    | 0.355  | 2.38E-17 |
| CYC1      | 0.280  | 4.49E-11 | TLR4     | -0.236 | 3.32E-08 |
| CYTOR     | 0.216  | 4.47E-07 | TM6SF1   | -0.244 | 1.13E-08 |
| DACH1     | -0.225 | 1.46E-07 | TMED3    | 0.250  | 4.84E-09 |
| DANT2     | -0.205 | 1.73E-06 | TMEM177  | 0.316  | 7.07E-14 |
| DAP3      | 0.260  | 1.04E-09 | TMEM47   | -0.277 | 6.97E-11 |
| DCST1-AS  | 0.230  | 7.42E-08 | TMEM52   | 0.202  | 2.5E-06  |
| DDX39A    | 0.232  | 5.46E-08 | TMEM75   | -0.215 | 4.96E-07 |
| DECR2     | 0.275  | 1.04E-10 | TMEM99   | 0.249  | 5.13E-09 |
| DEFB131B  | -0.277 | 6.82E-11 | TNFRSF18 | 0.221  | 2.4E-07  |
| DGAT1     | 0.253  | 2.86E-09 | TNFSF12  | 0.269  | 2.6E-10  |
| DIRAS1    | 0.233  | 4.91E-08 | TNS1     | -0.227 | 1.18E-07 |
| DIXDC1    | -0.328 | 7.1E-15  | TRAF4    | 0.330  | 4.38E-15 |
| DLEU1     | -0.208 | 1.23E-06 | TRAJ1    | -0.241 | 1.66E-08 |
| DLEU2     | -0.203 | 2.33E-06 | TRIM47   | 0.223  | 1.95E-07 |
| DLG5      | -0.205 | 1.7E-06  | TRPT1    | 0.311  | 2.02E-13 |
| DLX3      | 0.214  | 5.55E-07 | TSPAN18  | -0.210 | 9.54E-07 |
| DNAJC10   | -0.348 | 1.23E-16 | TSTA3    | 0.202  | 2.36E-06 |
| DOCK11    | -0.286 | 1.57E-11 | TTC28    | -0.334 | 1.97E-15 |
| DOCK4     | -0.291 | 6.79E-12 | TTC6     | -0.216 | 4.28E-07 |
| DOP1B     | -0.228 | 9.38E-08 | TTF2     | -0.259 | 1.18E-09 |
| DPRXP4    | -0.214 | 5.55E-07 | TTLL7    | -0.218 | 3.69E-07 |
| DPY19L1P  | -0.255 | 2.17E-09 | TUBA4A   | 0.217  | 4.16E-07 |
| DPY19L1P  | -0.218 | 3.63E-07 | TUBB8P1  | -0.234 | 4.16E-08 |
| DTX2      | 0.208  | 1.27E-06 | TUBG1    | 0.200  | 3.07E-06 |
| DTYMK     | 0.274  | 1.09E-10 | TXNDC12  | -0.253 | 2.93E-09 |
| DUBR      | -0.264 | 5.33E-10 | TXNDC17  | 0.471  | 7.46E-31 |
| DUS1L     | 0.315  | 8.91E-14 | TXNP6    | -0.224 | 1.68E-07 |
| DUSP23    | 0.255  | 2.05E-09 | TYROBP   | 0.267  | 3.5E-10  |
| DYRK2     | -0.215 | 5.43E-07 | U62317.4 | 0.207  | 1.38E-06 |
| ECE2      | 0.295  | 3.34E-12 | UBASH3B  | -0.216 | 4.63E-07 |
| ECM2      | -0.287 | 1.35E-11 | UBE2L4   | -0.229 | 8.06E-08 |
| EEF2KMT   | 0.214  | 5.75E-07 | UBE2R2-A | -0.248 | 5.8E-09  |
| EFCAB13   | -0.220 | 2.63E-07 | UBFD1    | -0.210 | 9.2E-07  |
| EFNA3     | 0.263  | 6.64E-10 | UCN      | 0.203  | 2.22E-06 |
| EFNA4     | 0.339  | 6.93E-16 | UQCC2    | 0.242  | 1.41E-08 |
| EIPR1-IT1 | -0.242 | 1.4E-08  | UQCC3    | 0.456  | 7.02E-29 |
| ELMO3     | 0.256  | 1.87E-09 | URB1     | -0.210 | 9.9E-07  |
| EML1      | -0.269 | 2.73E-10 | USP3-AS1 | -0.239 | 2.29E-08 |
| ENO1      | 0.225  | 1.47E-07 | UTAT33   | -0.201 | 2.93E-06 |
| ENPP2     | -0.261 | 8.87E-10 | UTRN     | -0.352 | 4.3E-17  |
| ENTPD7    | -0.324 | 1.41E-14 | VCAN     | -0.241 | 1.56E-08 |
| EPB41L2   | -0.399 | 6.54E-22 | VGLL3    | -0.248 | 6.11E-09 |
| EPHA10    | 0.238  | 2.42E-08 | VN1R42P  | -0.211 | 8.83E-07 |
| EPHX3     | 0.236  | 3.13E-08 | VPS72    | 0.250  | 4.66E-09 |
| ERCC6L    | -0.234 | 4.17E-08 | VWF      | -0.229 | 8.03E-08 |
| ERG       | -0.242 | 1.45E-08 | WASHC5-  | -0.250 | 4.91E-09 |
| ERI3-IT1  | -0.248 | 6.37E-09 | WDR46    | 0.204  | 1.94E-06 |
| ETS1      | -0.320 | 3.24E-14 | WFDC3    | 0.236  | 3.14E-08 |
| EXOSC4    | 0.366  | 2.12E-18 | WISP1    | -0.256 | 1.83E-09 |
| EXOSC5    | 0.333  | 2.42E-15 | WWC2     | -0.251 | 3.92E-09 |

|          |        |          |          |        |          |
|----------|--------|----------|----------|--------|----------|
| F12      | 0.206  | 1.52E-06 | XBP1P1   | -0.241 | 1.68E-08 |
| FAM198B  | -0.233 | 5.26E-08 | YDJC     | 0.219  | 3.23E-07 |
| FAM241B  | 0.350  | 7.44E-17 | YPEL5P2  | -0.255 | 2.05E-09 |
| FAM49A   | -0.230 | 7.14E-08 | Z69666.1 | -0.237 | 2.98E-08 |
| FAM83B   | -0.243 | 1.24E-08 | Z82243.1 | -0.275 | 9.51E-11 |
| FANCI    | -0.200 | 3.12E-06 | Z98885.3 | -0.251 | 3.96E-09 |
| FAR2     | -0.219 | 2.93E-07 | Z99129.1 | -0.274 | 1.14E-10 |
| FAT1     | -0.285 | 1.99E-11 | Z99129.4 | -0.245 | 9.71E-09 |
| FBP1     | 0.211  | 8.01E-07 | ZBED6    | -0.293 | 5.13E-12 |
| FBXL16   | 0.239  | 2.05E-08 | ZBTB20-A | -0.251 | 3.96E-09 |
| FBXL6    | 0.229  | 8.5E-08  | ZBTB41   | -0.225 | 1.49E-07 |
| FBXO2    | 0.214  | 6.17E-07 | ZC3HAV1  | -0.261 | 9.47E-10 |
| FCRL5    | -0.265 | 4.76E-10 | ZEB1     | -0.355 | 2.3E-17  |
| FDX1P1   | -0.241 | 1.64E-08 | ZEB2     | -0.313 | 1.2E-13  |
| FERMT2   | -0.259 | 1.13E-09 | ZFYVE9   | -0.323 | 1.96E-14 |
| FERP1    | -0.201 | 2.66E-06 | ZGRF1    | -0.279 | 4.69E-11 |
| FGD6     | -0.200 | 3.12E-06 | ZKSCAN2  | -0.206 | 1.64E-06 |
| FGF2     | -0.272 | 1.68E-10 | ZNF106   | -0.413 | 2.07E-23 |
| FLAD1    | 0.282  | 3.32E-11 | ZNF107   | -0.229 | 8.16E-08 |
| FLI1     | -0.255 | 2.08E-09 | ZNF124   | -0.215 | 5E-07    |
| FMO2     | -0.203 | 2.18E-06 | ZNF146   | -0.285 | 2E-11    |
| FO680682 | -0.218 | 3.33E-07 | ZNF215   | -0.242 | 1.51E-08 |
| FOXD3-A  | 0.245  | 8.76E-09 | ZNF29P   | -0.209 | 1.06E-06 |
| FRAS1    | -0.250 | 4.57E-09 | ZNF346-1 | -0.256 | 1.79E-09 |
| FRGCA    | 0.327  | 8.8E-15  | ZNF367   | -0.201 | 2.86E-06 |
| FRK      | -0.296 | 2.62E-12 | ZNF451-A | -0.254 | 2.36E-09 |
| FRMD3    | -0.270 | 2.12E-10 | ZNF587   | -0.320 | 3.03E-14 |
| FRMD4A   | -0.318 | 4.56E-14 | ZNF724   | -0.225 | 1.52E-07 |
| FRY      | -0.302 | 9.37E-13 | ZNF850   | -0.243 | 1.28E-08 |
| FZD3     | -0.289 | 1.01E-11 | ZNF92    | -0.253 | 2.94E-09 |
| GAB1     | -0.300 | 1.35E-12 | ZP3      | 0.214  | 5.72E-07 |
| GALE     | 0.222  | 2.24E-07 | ZWILCH   | -0.226 | 1.2E-07  |
| GALNT7   | -0.270 | 2.03E-10 |          |        |          |
| GAMT     | 0.443  | 3.84E-27 |          |        |          |
| GAPDHP6  | -0.236 | 3.19E-08 |          |        |          |
| GAS5     | 0.230  | 7.21E-08 |          |        |          |
| GATA6    | -0.237 | 3.03E-08 |          |        |          |
| GCAT     | 0.360  | 8.64E-18 |          |        |          |
| GEN1     | -0.321 | 2.69E-14 |          |        |          |
| GFOD1    | -0.310 | 2.34E-13 |          |        |          |
| GFPT1    | -0.208 | 1.19E-06 |          |        |          |
| GIMAP5   | -0.271 | 1.77E-10 |          |        |          |
| GIMAP8   | -0.237 | 2.83E-08 |          |        |          |
| GMFG     | 0.221  | 2.3E-07  |          |        |          |
| GMPPA    | 0.231  | 6.53E-08 |          |        |          |
| GNAQ     | -0.342 | 4.09E-16 |          |        |          |
| GPR174   | -0.269 | 2.71E-10 |          |        |          |
| GPR18    | -0.240 | 1.92E-08 |          |        |          |
| GPR82    | -0.227 | 1.1E-07  |          |        |          |
| GRK5     | -0.262 | 7.47E-10 |          |        |          |
| GTF2IP9  | -0.275 | 1.03E-10 |          |        |          |
| GUCY1A2  | -0.300 | 1.36E-12 |          |        |          |

---
