# Supplementary material for: Identification and Validation of a GPX4-Related Immune Prognostic Signature for Lung Adenocarcinoma
Source: Hindawi journal article supplement (doi:10.1155/2022/9054983), 2022-05-17
Supplement: f1 [file 9054983.f1.zip]

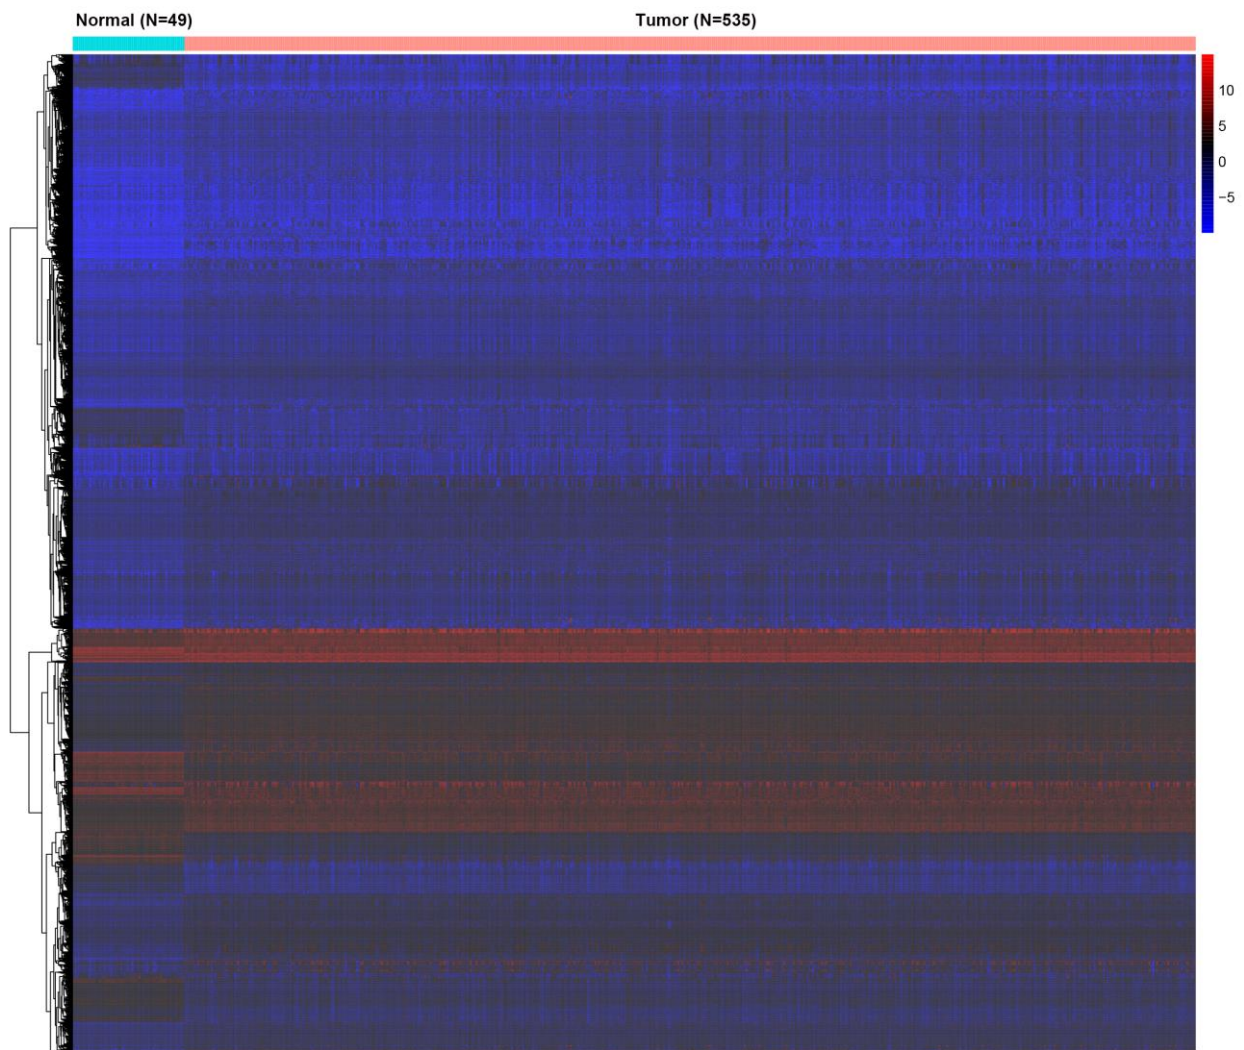

Figure S1: Heat map of differentially expressed gene samples between lung adenocarcinoma and normal tissues.

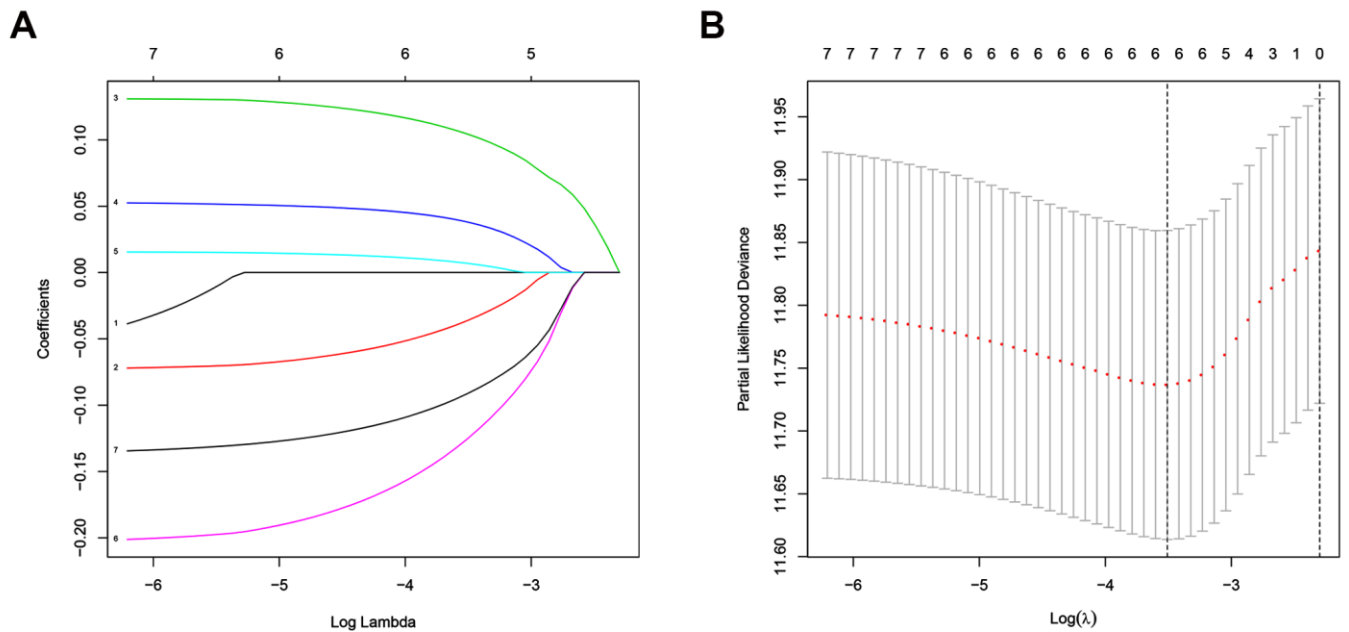

Figure S2: Gene selection using the least absolute shrinkage and selection operator model. (A) 10-fold cross-validation for the coefficients of 7 GPX4-related DEGs in the LASSO model. (B) X-tile analysis of the 6 selected GPX4-related prognostic DEGs.

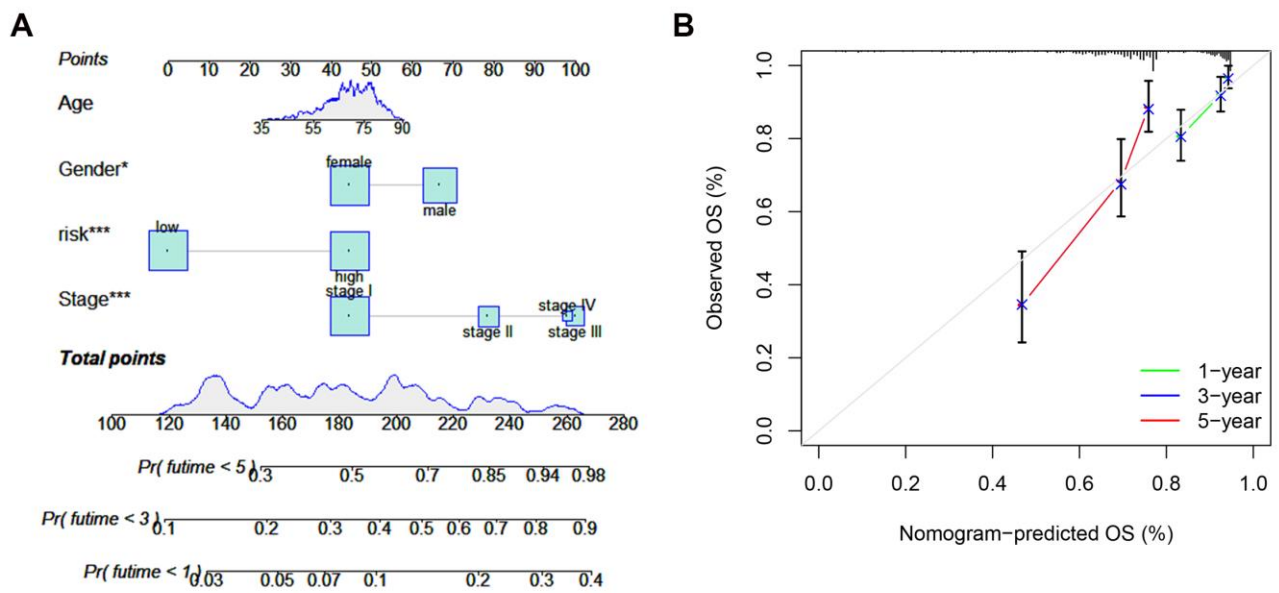

Figure S3: Validation of nomogram based on GSE72094 dataset. (A) The nomogram plot. (B) The nomogram calibration curves in the years 1, 3, 5.

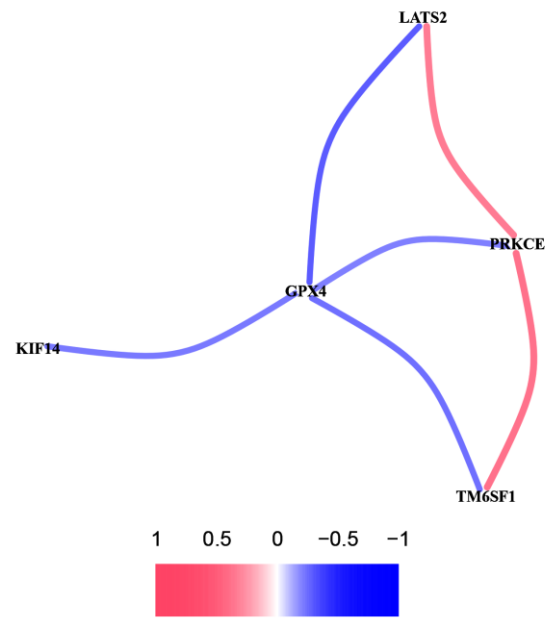

Figure S4: Connection network for four GPX4-related prognostic genes and GPX4.
