# Supplementary material for: Identification and Validation of a GPX4-Related Immune Prognostic Signature for Lung Adenocarcinoma
Source: Hindawi journal article supplement (doi:10.1155/2022/9054983), 2022-05-17
Supplement: f1 [file 9054983.f1.zip]

Table S6: GSEA in the high-risk score cohort

| Name                       | SIZE | ES    | NES   | NOM p-val | FDR q-val | RANK AT MAX |
|----------------------------|------|-------|-------|-----------|-----------|-------------|
| Cell cycle                 | 124  | 0.726 | 2.291 | < 0.001   | 0.001     | 6262        |
| RNA degradation            | 59   | 0.641 | 2.120 | < 0.001   | 0.005     | 6462        |
| Base excision repair       | 35   | 0.714 | 2.057 | < 0.001   | 0.005     | 5618        |
| DNA replication            | 36   | 0.861 | 2.069 | < 0.001   | 0.006     | 2715        |
| Nucleotide excision repair | 44   | 0.66  | 2.009 | 0.002     | 0.007     | 9025        |
| Homologous recombination   | 28   | 0.759 | 1.996 | 0.002     | 0.007     | 8306        |
| Pentose phosphate pathway  | 27   | 0.655 | 1.923 | < 0.001   | 0.010     | 4301        |
| Mismatch repair            | 23   | 0.788 | 1.955 | < 0.001   | 0.011     | 2312        |
| RNA polymerase             | 28   | 0.624 | 1.820 | 0.010     | 0.022     | 7635        |
