# Supplementary material for: Identification and Validation of a GPX4-Related Immune Prognostic Signature for Lung Adenocarcinoma
Source: Hindawi journal article supplement (doi:10.1155/2022/9054983), 2022-05-17
Supplement: f1 [file 9054983.f1.zip]

Table S1: The clinical peculiarity of LUAD patients from the TCGA and GSE72094 dataset

| Dataset              | TCGA            | GSE72094          |
|----------------------|-----------------|-------------------|
| Cohort               | Training cohort | Validation cohort |
| Total patients       | 477             | 386               |
| Age at diagnosis (y) | 66(33-88)       | 66(38-89)         |
| Gender               |                 |                   |
| Male/Female          | 220/257         | 168/218           |
| Smoking              |                 |                   |
| Never/Ever           | -               | 95/291            |
| TNM stage            |                 |                   |
| I/II/III/IV/unknow   | 253/113/78/25/8 | 246/65/56/14/5    |
| T stage              |                 |                   |
| T1/T2/T3/T4/TX       | 159/254/43/18/3 | -                 |
| N stage              |                 |                   |
| N0/N1/N2/N3/NX       | 307/90/67/2/11  | -                 |
| M stage              |                 |                   |
| M0/M1/MX             | 313/24/140      | -                 |
| Survival status      |                 |                   |
| Dead/Alive           | 157/320         | 109/277           |
