# Supplementary material for: Identification and Validation of a GPX4-Related Immune Prognostic Signature for Lung Adenocarcinoma
Source: Hindawi journal article supplement (doi:10.1155/2022/9054983), 2022-05-17
Supplement: f1 [file 9054983.f1.zip]

Table S4: Multivariable Cox model outcomes of genes in the GPS

| ID     | coef   | HR    | HR.95L | HR.95H | p value |
|--------|--------|-------|--------|--------|---------|
| KIF14  | 0.104  | 1.109 | 1.013  | 1.215  | 0.025   |
| LATS2  | 0.058  | 1.059 | 1.015  | 1.106  | 0.008   |
| PRKCE  | -0.268 | 0.765 | 0.612  | 0.955  | 0.018   |
| TM6SF1 | -0.204 | 0.815 | 0.680  | 0.977  | 0.027   |
